# Supplementary material for: A first-principles study on the defective properties of MAX phase Cr2AlC: the magnetic ordering and strong correlation effect
Source: Royal Society of Chemistry journal article supplement (doi:10.1039/c6ra15366f), 2016-01-01
Supplement: c6ra15366f1.pdf [file c6ra15366f1.pdf]

## Supporting Information

Han Han<sup>a</sup>, Darshana Wickramaratne<sup>b</sup>, Qing Huang<sup>a</sup>, Jianxing Dai<sup>a</sup>, Tongwei Li<sup>c</sup>, Hui Wang<sup>c,\*</sup>,  
Wei Zhang<sup>a,\*</sup> and Ping Huai<sup>a</sup>

<sup>a</sup>Shanghai Institute of Applied Physics, Chinese Academy of Sciences, Shanghai 201800, China

<sup>b</sup>Materials Department, University of California, Santa Barbara, CA 93106, USA

<sup>c</sup>School of Physics and Engineering, Henan University of Science and Technology, Luoyang 471003, China

Correspondence and requests for materials should be addressed to Wei Zhang (zhangwei@sinap.ac.cn) and

Hui Wang (nkxirainbow@gmail.com).

### Contents

**Part 1. The calculated structural and mechanical parameters of Cr<sub>2</sub>AlC compared with experimental data.**

**Part 2. The defect formation energies of interstitials with various positions.**

**Part 3. The detailed data for defect formation energies in Cr<sub>2</sub>AlC.**

**Part 4. The projected density of states of Cr<sub>2</sub>AlC for Cr-3*d* and C-2*p* orbitals.**

**Part 5. The detailed data for defect formation energies of Cr<sub>2</sub>AlC with different magnetic structures.**

**Part 1. The calculated structural and mechanical parameters of Cr<sub>2</sub>AlC compared with experimental data.**

Table S1. Lattice parameters (in Å), unit cell volumes (in Å<sup>3</sup>), and the elastic properties (bulk modulus  $B$ , shear modulus  $G$ , and Young's modulus  $E$  (in GPa) of Cr<sub>2</sub>AlC studied herein. Also included are previous determinations of the same parameters measured by experiments (Exp.). The NM, NM+U, AFM, and AFM+U represent the results obtained by non-magnetic PBE calculation, PBE+U calculation, calculation with antiferromagnetic spin-ordering, and PBE+U calculation with antiferromagnetic spin-ordering (AFM+U), respectively. The magnetic ordering is in-AFM1.

|     | NM       | NM+U     | AFM     | AFM+U   | Exp.                                                                                                        |
|-----|----------|----------|---------|---------|-------------------------------------------------------------------------------------------------------------|
| $a$ | 2.841    | 2.841    | 2.849   | 2.864   | 2.858 <sup>a</sup> , 2.86 <sup>b</sup> , 2.863 <sup>c</sup> ,<br>2.854 <sup>d</sup> , 2.848 <sup>e</sup>    |
| $c$ | 12.683   | 12.683   | 12.697  | 12.792  | 12.808 <sup>a</sup> , 12.82 <sup>b</sup> , 12.814 <sup>c</sup> ,<br>12.82 <sup>d</sup> , 12.72 <sup>e</sup> |
| $V$ | 88.653   | 88.653   | 89.252  | 90.869  | 90.602 <sup>a</sup> , 90.814 <sup>b</sup>                                                                   |
| $B$ | 196.3406 | 196.3406 | 179.132 | 155.008 | 139 <sup>f</sup> , 165 <sup>g</sup> , 138 <sup>h</sup>                                                      |
| $G$ | 117.306  | 117.306  | 117.405 | 113.688 | 105 <sup>h</sup>                                                                                            |
| $E$ | 293.473  | 293.473  | 289.064 | 274.062 | 245 <sup>h</sup>                                                                                            |

<sup>a</sup>See Ref.[1].

<sup>e</sup>See Ref.[5].

<sup>b</sup>See Ref.[2].

<sup>f</sup>See Ref.[6].

<sup>c</sup>See Ref.[3].

<sup>g</sup>See Ref.[7].

<sup>d</sup>See Ref.[4].

<sup>h</sup>See Ref.[8].

**Part 2. The defect formation energies of interstitials with various positions.**

Table S2. Defect formation energies ( $E_{\text{def}}$ , in eV) of Cr<sub>i</sub>, Al<sub>i</sub>, and C<sub>i</sub> in Cr<sub>2</sub>AlC. The interstitials are much more stable between Cr-Al layers than between Cr-C layers. The Al<sub>i</sub> is unstable between Cr-C layers.

| Positions | Cr <sub>i</sub> | Al <sub>i</sub> | C <sub>i</sub> |
|-----------|-----------------|-----------------|----------------|
| Cr-Al     | 4.34            | 4.49            | 2.18           |
| Cr-C      | 6.22            | -               | 4.69           |

### Part 3. The detailed data for defect formation energies in Cr<sub>2</sub>AlC.

Table S3. Defect formation energies ( $E_{\text{def}}$ , in eV) of on-lattice defects in Cr<sub>2</sub>AlC. The results of  $E_{\text{def}}$  for the most studied Ti<sub>3</sub>SiC<sub>2</sub> calculated by previous work [9] are also listed for comparison. All the Defect formation energies were calculated with the chemical potentials of atoms assumed to be the bulk crystals of elementary substance.

| Defect           | NM    | AFM+U | Ti <sub>3</sub> SiC <sub>2</sub> <sup>[9]</sup> |
|------------------|-------|-------|-------------------------------------------------|
| V <sub>Cr</sub>  | 1.95  | 1.16  | 5.5                                             |
| V <sub>Al</sub>  | 2.03  | 2.47  | 2.1                                             |
| V <sub>C</sub>   | 0.97  | 0.81  | 2.1                                             |
| Cr <sub>i</sub>  | 4.34  | 5.42  | 3.6                                             |
| Al <sub>i</sub>  | 4.49  | 4.16  | 2.1                                             |
| C <sub>i</sub>   | 2.18  | 2.24  | 0.9                                             |
| Cr <sub>Al</sub> | 1.34  | 2.13  | 1.8                                             |
| Al <sub>Cr</sub> | 0.93  | -0.23 | 3.2                                             |
| Cr <sub>C</sub>  | 5.32  | 6.47  | 8.0                                             |
| C <sub>Cr</sub>  | 4.16  | 2.92  | 5.9                                             |
| Al <sub>C</sub>  | 4.83  | 4.66  | 3.4                                             |
| C <sub>Al</sub>  | 15.83 | 15.65 | 3.2                                             |

**Part 4. The projected density of states of Cr<sub>2</sub>AlC for Cr-3d and C-2p orbitals.**

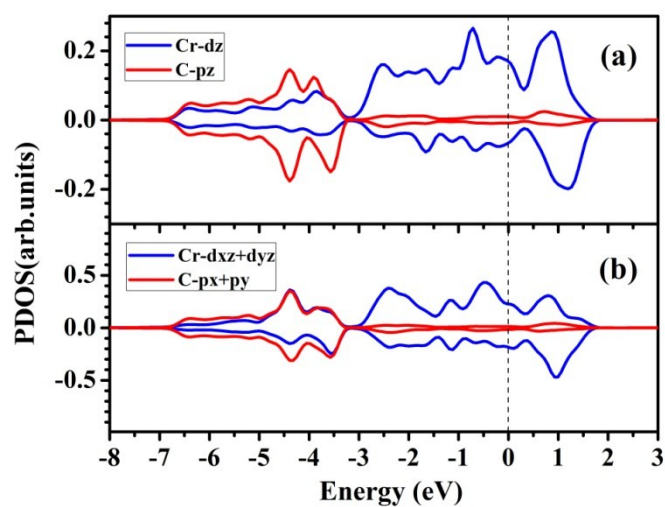

Figure S1. The projected density of states (PDOS) of Cr<sub>2</sub>AlC for Cr-d and C-p orbitals. The projection method is the same to Fig. 6, but without the rotation. In other words, the dz<sup>2</sup>-orbital is now aligned with the cell axis. It can be seen the dz<sup>2</sup>-orbital spin splitting can not be obviously observed without rotation.

**Part 5. The detailed data for defect formation energies of Cr<sub>2</sub>AlC with different magnetic structures.**

Table S4. Defect formation energies ( $E_{\text{def}}$  in eV,  $U= 0$  eV) of on-lattice defects in Cr<sub>2</sub>AlC with different magnetic structures illustrated in Fig. S2.

| Defect           | NM    | (a)   | (b)   | (c)   | (d)   | (e)   | (f)   |
|------------------|-------|-------|-------|-------|-------|-------|-------|
| V <sub>Cr</sub>  | 1.95  | 1.76  | 2.03  | 2.01  | 2.09  | 2.08  | 1.95  |
| V <sub>Al</sub>  | 2.03  | 1.73  | 2.44  | 2.24  | 2.52  | 2.26  | 1.77  |
| V <sub>C</sub>   | 0.97  | 0.71  | 1.27  | 1.26  | 1.37  | 1.14  | 0.93  |
| Cr <sub>i</sub>  | 4.34  | 4.21  | 4.29  | 4.29  | 4.36  | 4.29  | 3.80  |
| Al <sub>i</sub>  | 4.49  | 4.28  | 4.31  | 4.44  | 4.85  | 4.39  | 4.40  |
| C <sub>i</sub>   | 2.18  | 1.97  | 2.19  | 2.18  | 2.26  | 2.21  | 2.14  |
| Cr <sub>Al</sub> | 1.34  | 0.94  | 1.12  | 1.19  | 1.22  | 1.2   | 0.72  |
| Al <sub>Cr</sub> | 0.93  | 0.64  | 0.92  | 1.01  | 1.14  | 0.92  | 0.85  |
| Cr <sub>C</sub>  | 5.32  | 5.16  | 3.71  | 3.75  | 3.85  | 5.35  | 3.38  |
| C <sub>Cr</sub>  | 4.16  | 3.99  | 4.24  | 4.26  | 4.3   | 4.24  | 3.76  |
| Al <sub>C</sub>  | 4.83  | 4.58  | 4.77  | 4.92  | 4.69  | 4.87  | 4.26  |
| C <sub>Al</sub>  | 15.83 | 15.57 | 15.76 | 15.91 | 15.68 | 15.86 | 15.25 |

## References for Supporting Information:

- 1 M. Baben, L. Shang, J. Emmerlich and J. M. Schneider, *Acta Materialia*, 2012, **60**, 4810-4818.
- 2 W. Jeitschko, H. Nowotny and F. Benesovsky, *Monatshefte für Chemie und verwandte Teile anderer Wissenschaften*, **94**, 672-676.
- 3 W. Tian, P. Wang, G. Zhang, Y. Kan, Y. Li and D. Yan, *Scripta Materialia*, 2006, **54**, 841-846.
- 4 J. C. Schuster, H. Nowotny and C. Vaccaro, *Journal of Solid State Chemistry*, 1980, **32**, 213-219.
- 5 Z. Sun, R. Ahuja, S. Li and J. M. Schneider, *Applied Physics Letters*, 2003, **83**, 899-901.
- 6 S. E. Lofland, J. D. Hettinger, K. Harrell, P. Finkel, S. Gupta, M. W. Barsoum and G. Hug, *Applied Physics Letters*, 2004, **84**, 508-510.
- 7 B. Manoun, R. P. Gulve, S. K. Saxena, S. Gupta, M. W. Barsoum and C. S. Zha, *Physical Review B*, 2006, **73**, 024110.
- 8 J. D. Hettinger, S. E. Lofland, P. Finkel, T. Meehan, J. Palma, K. Harrell, S. Gupta, A. Ganguly, T. El-Raghy and M. W. Barsoum, *Physical Review B*, 2005, **72**, 115120.
- 9 H. Zhang, J. Wang, J. Wang, Y. Zhou, S. Peng and X. Long, *Journal of Nanomaterials*, 2013, **2013**, 5.
